# Supplementary material for: Mex3a promoter hypomethylation can be utilized to diagnose HBV-associated hepatocellular carcinoma: a randomized controlled trial
Source: Front Pharmacol. 2024 Nov 5;15:1325869. doi: 10.3389/fphar.2024.1325869 (PMC11574524; doi:10.3389/fphar.2024.1325869)
Supplement: Supplementary file 1 [file Table1.xlsx]

## Sheet: Sheet1
name	participants（1=HCC，2=CHB，3=NC）	PMR	mRNA level 2-△△T
1	1	1.90999	45.3365
2	1	1.58866	3.45456
3	1	1.04659	12.4537
4	1	1.90999	20.3718
5	1	1.58866	3.07056
6	1	2.04659	37.9321
7	1	0.381092	3.29094
8	1	0.170228	1.85125
9	1	0.126192	2.42587
10	1	0.647187	7.25261
11	1	0.814761	3.96824
12	1	1.29131	34.7394
13	1	0.490942	2.69167
14	1	0.190998	3.80659
15	1	0.417859	2.01182
16	1	0.399052	0.0758083
17	1	0.282508	3.45456
18	1	0.495822	24.3948
22	1	0.693474	2.32705
23	1	1.41589	3.06115
24	1	0.833739	0.400119
25	1	0.914176	6.44643
26	1	0.408348	15.4389
27	1	0.490942	33.5764
34	1	0.693474	2.09725
35	1	0.833739	0.0702431
36	1	1.41589	14.7838
37	1	0.914176	1.47274
38	1	0.408348	33.0387
48	1	1.44887	24.4114
49	1	0.0257228	0.397355
50	1	1.58866	0.938546
51	1	0.447744	13.027
52	1	0.60399	1.16352
53	1	0.276077	1.87709
136	1	2.24404	47.1318
137	1	1.93367	23.5951
138	1	0.468846	0.485913
139	1	0.0055085	34.0282
140	1	0.95726	17.0251
141	1	0.0009573	2.15169
142	1	0.0123319	9.85724
143	1	0.0037242	21.0814
144	1	1	34.9802
145	1	0.853159	19.2531
146	1	0.0590242	12.6803
147	1	0.355656	27.0018
148	1	0.251785	20.0897
149	1	0.0282508	0.31017
150	1	0.0132139	0.0020283
151	1	1.48262	7.0186
152	1	0.427592	0.031639
153	1	0.0039905	8.81361
154	1	0.590242	8.81361
155	1	0.0162566	0.0012641
156	1	0.472616	28.0006
157	1	1.82502	13.0347
158	1	0.677688	0.0616112
159	1	0.302712	4.43788
160	1	0.0182402	0.19816
161	1	0.514079	3.02692
162	1	0.760379	0.132848
163	1	0.246054	4.34047
164	1	0.0237447	0.000276
165	1	0.126192	1.62209
166	1	1	22.1799
167	1	3.81092	12.9467
168	1	0.0091418	0.158979
169	1	0.618059	21.0797
170	1	0.550846	0.0502412
171	1	0.166353	0.0501101
172	1	0.182402	8.36588
173	1	1.32139	5.03218
174	1	0.074307	1.98323
175	1	0.0550846	1.15899
176	1	0.077809	0.0738887
177	1	6.32456	5.97049
178	1	0.263651	0.0551421
179	1	0.408348	0.0094845
180	1	3.16979	0.0012201
181	1	0.219296	0.222451
182	1	0.0514079	0.0560031
183	1	0.190998	32.6328
184	1	0.677688	10.5762
185	1	1.15088	0.90801
186	1	0.0502377	0.130717
187	1	0.190998	0.181567
188	1	0.100237	0.0457437
189	1	0.538307	18.0001
190	1	1.26191	0.0434927
191	1	1.58866	32.2531
192	1	2.76077	0.0273531
193	1	0.246054	0.684949
194	1	0.17825	0.0022043
195	1	0.166353	5.44343
196	1	0.0166353	0.189946
197	1	0.0399052	1.10536
198	1	0.647187	0.0106084
199	1	0.302712	8.30916
200	1	0.0002094	10.1344
201	1	1.23319	0.0029205
202	1	0.447744	17.8913
203	1	0.077809	0.0100815
204	1	0.502377	41.967
205	1	0.0001449	7.59219
206	1	0.309763	0.0184255
207	1	0.724174	25.2798
208	1	1.07406	0.106175
209	1	0.129131	0.0060235
210	1	0.107406	1.3041
211	1	0.77809	0.0284628
212	1	0.632455	0.0263604
213	1	0.132139	1.74253
214	1	0.0417859	0.27634
215	1	0.316979	0.019538
216	1	0.289088	1.49954
217	1	0.229631	0.0153853
218	1	0.0214304	40.9978
219	1	2.24404	0.0085316
220	1	0.224404	32.6711
221	1	1.51716	0.195402
222	1	0.60399	1.28745
223	1	1.12468	0.146457
224	1	0.276077	0.0033721
225	1	0.618059	0.009447
226	1	0.0107406	5.39336
227	1	0.141589	0.0781899
228	1	0.102572	1.92519
229	1	0.538307	4.33045
230	1	0.468846	0.121078
231	1	1.12468	0.0017007
232	1	0.437552	82.32
233	1	0.632455	0.188555
234	1	0.399052	0.0096485
235	1	0.0263651	0.0112818
236	1	0.104961	31.0369
237	1	0.0120512	0.0024279
238	1	0.590242	0.510071
239	1	0.77809	4.74973
240	1	3	87.0602
241	1	0.282508	0.875784
242	1	0.138366	0.189692
243	1	0.647187	42.0024
244	1	0.632455	27.0302
245	1	1.38366	0.0035331
246	1	0.814761	26.022
247	1	0.17825	0.0337516
248	1	0.144887	0.0162464
249	1	2.3498	2.22096
250	1	0.219296	0.0128992
251	1	1.32139	5.13246
252	1	0.295822	0.0004886
253	1	3.4756	1.92524
254	1	0.174193	0.0090135
255	1	0.0437552	1.30486
256	1	0.295822	0.0509078
257	1	1.90999	2.99215
258	1	0.0028251	26.6229
259	1	1.69786	0.196666
260	1	0.590242	0.0022506
261	1	0.0833739	3.35858
262	1	1.41589	0.00369
263	1	0.0331917	10.0876
264	1	1.95447	1.3049
265	1	0.263651	33.6304
266	1	1.48262	0.139984
267	1	2.51785	25.547
268	1	0.155249	0.0073092
269	1	0.141589	0.0533334
270	1	0.240453	0.0287278
271	1	1.12468	27.8805
272	1	0.219296	50.2461
273	1	0.399052	0.565598
274	1	0.109908	88.9383
275	1	0.2	4.81605
276	1	0.408348	3.16276
277	1	0.502377	1.47482
278	1	1.62566	31.6789
279	1	0.060399	1.75871
280	1	0.295822	0.00054
281	1	0.814761	35.6176
282	1	0.437552	0.308727
283	1	0.141589	0.400864
284	1	0.632455	3.16276
285	1	0.526054	8.76153
286	1	0.502377	0.0175057
287	1	0.339649	0.204851
288	1	1.44887	26.1162
289	1	1.02572	0.0503384
290	1	0.309763	0.0293208
291	1	0.724174	36.0063
292	1	1.07406	42.2312
293	1	0.129131	5.92925
294	1	0.107406	0.033443
295	1	0.77809	21.9623
296	1	0.632455	0.415914
297	1	0.132139	15.0447
298	1	0.0417859	13.4216
299	1	0.316979	0.949024
300	1	0.289088	20.9125
301	1	0.229631	0.252528
302	1	0.0214304	0.0075876
303	1	0.244037	2.58683
304	1	0.224404	5.86967
305	1	1.51716	6.25994
306	1	0.60399	0.161933
307	1	1.12468	39.0153
308	1	0.276077	0.0255057
309	1	0.219296	35.0186
310	1	1.32139	2.44164
311	1	0.295822	3.74172
312	1	0.475602	0.0656387
313	1	0.174193	8.39106
314	1	0.0437552	0.0352011
315	1	0.295822	0.0011654
316	1	1.00999	41.8309
317	1	0.0009573	0.0296035
318	1	0.0123319	0.116023
319	1	0.0037242	0.0295203
320	1	0.0038242	55.8355
321	1	0.853159	0.57615
322	1	0.0590242	0.4074
323	1	0.355656	10.8117
324	1	0.251785	0.0035333
325	1	0.0282508	0.417887
326	1	0.0132139	17.7677
327	1	1.48262	34.5636
328	1	0.437552	12.7685
329	1	0.632455	0.514839
19	2	0.74307	6.53642
20	2	1.2244	6.45246
21	2	0.417859	1.33654
28	2	0.263651	11.7819
29	2	2.10257	2.26341
30	2	0.468846	0.751841
31	2	0.289088	2.12653
32	2	3.63246	5.12315
33	2	0.34756	2.72924
39	2	0.34756	0.472537
40	2	0.550846	15.0583
41	2	3.43755	0.649995
42	2	0.381092	7.47582
43	2	1.82402	1.6341
44	2	0.399052	6.70149
45	2	0.155249	2.14132
46	2	0.447744	1.9568
47	2	0.246054	0.74149
54	2	5.38307	1.61161
55	2	3.16979	4.75189
56	2	3.81092	2.06838
57	2	4.17859	2.05409
58	2	8.33739	1.92987
59	2	4.79767	1.66844
60	2	0.60399	7.03817
61	2	5.26054	1.46256
62	2	0.316979	3.34832
63	2	0.214304	0.945075
64	2	0.563677	1.17977
65	2	0.162566	0.348324
66	2	2.09142	8.19324
67	2	1.00017	5.41423
68	2	0.107406	0.402902
69	2	0.677688	28.2622
70	2	2.01026	0.301139
71	2	0.0339649	5.12838
72	2	1.00073	0.117318
93	2	0.590242	8.00031
94	2	0.135217	4.00006
95	2	0.269793	0.0001811
96	2	0.295822	4.00012
97	2	1.09142	6
98	2	0.251785	7.00008
99	2	0.269793	4.00011
100	2	0.417859	5.00001
101	2	0.151716	3.24e-05
102	2	0.132139	8.00002
103	2	0.632455	0.000125
104	2	0.195447	5.00168
105	2	2.00853	0.0001886
106	2	0.0408348	8.00036
107	2	0.0129131	5.76e-05
108	2	0.0647187	5.00026
109	2	1.00935	0.0002431
110	2	0.0229631	0.0002311
111	2	0.0155249	9.0003
112	2	0.399052	5.00026
113	2	0.447744	9.00002
114	2	1.00237	0.000504
115	2	1.82402	6.00076
116	2	0.229631	0.0002699
117	2	0.104961	0.0004435
118	2	0.135217	9.00028
119	2	1.02461	6.00001
120	2	0.381092	0.0001633
121	2	2.20512	9.00041
122	2	0.490942	0.0024821
123	2	0.34756	0.0001188
124	2	1.48262	3.00445
125	2	0.408348	8.92e-05
126	2	0.77809	6.00017
127	2	2.89088	3.00009
128	2	2.00458	7.00158
129	2	0.60399	4.00259
130	2	0.309763	9.00181
131	2	1.38366	0.0001325
132	2	0.0408348	6.00029
133	2	0.132139	0.0006801
134	2	1.01742	4.0488
135	2	0.209426	0.0002507
330	2	2.19296	0.57482
331	2	0.95726	7.00164
332	2	0.190998	0.0015385
333	2	0.158866	5.53219
334	2	0.123319	5.81824
335	2	0.979558	9.6321
336	2	0.246054	0.0057659
337	2	1.32139	6.05547
338	2	3.44774	19.5331
339	2	2.0048	0.103763
340	2	2	5.8893
341	2	0.269793	0.190288
342	2	0.833739	5.75498
343	2	0.760379	0.268784
344	2	0.399052	0.0458959
345	2	0.170228	7.134
346	2	0.170228	0.367785
347	2	0.490942	11.0644
348	2	0.246054	0.991614
349	2	0.95726	1.67155
350	2	2	1.02325
351	2	0.662262	1.98935
352	2	1.01449	12.6226
353	2	0.224404	0.268515
354	2	0.74307	6.13908
355	2	1.35217	0.254873
356	2	2.05261	6.07169
357	2	0.295822	7.00322
358	2	0.576806	0.175019
359	2	0.093547	2.64118
360	2	9.79558	4.64126
361	2	0.309763	0.313061
362	2	1.12468	1.32978
363	2	0.132139	0.296859
364	2	0.618059	3.00385
365	2	1.00065	0.524077
366	2	0.0979558	0.0050758
367	2	2	4.23154
368	2	0.25765	0.0004842
369	2	0.2	8.98706
370	2	1.20512	2.7297
371	2	0.170228	0.0028751
372	2	0.339649	1.00664
373	2	0.900364	0.177741
374	2	2.05508	2.83075
375	2	0.95726	0.150912
376	2	0.833739	15.0799
377	2	0.853159	18.999
378	2	0.112468	8.7818
379	2	0.102572	4.38e-05
380	2	2.63651	6.01673
381	2	0.190998	0.748038
382	2	14.8262	0.0008973
383	2	0.479767	2.94415
384	2	2.40453	9.30399
385	2	0.590242	0.0105827
386	2	0.309763	20.0359
387	2	1.00129	0.0309484
388	2	1.07096	6.04575
389	2	0.324362	0.0085212
390	2	0.95726	4.58795
391	2	1.12468	5.10967
392	2	0.550846	0.982491
393	2	0.309763	6.00229
394	2	0.399052	0.0078678
395	2	7	6.00264
396	2	0.269793	0.0288427
397	2	0.123319	0.318902
398	2	1.01074	2.26132
399	2	0.576806	1.39762
400	2	0.141589	3.57477
401	2	0.309763	0.288075
402	2	1.09908	0.0104826
403	2	0.0295822	0.0236478
404	2	0.458174	7.29976
405	2	0.251785	0.0463223
406	2	0.077809	0.106667
407	2	0.0437552	11.8038
408	2	0.914176	0.0078007
409	2	0.195447	6.01019
410	2	1.29131	0.0653817
411	2	1.00191	1.11562
412	2	0.0251785	0.547596
413	2	1.7825	15.3254
414	2	0.408348	16.4089
415	2	1.82402	1.99241
416	2	0.563677	0.0060362
417	2	1.48262	0.101356
418	2	0.023498	1.08763
419	2	1.15088	4.82719
420	2	0.246054	5.0033
421	2	0.25765	0.0222125
422	2	0.563677	2.02023
423	2	0.166353	8.02509
424	2	0.0833739	7.29478
425	2	2.95822	5.00625
426	2	0.60399	0.145711
427	2	0.833739	5.00266
428	2	0.490942	0.0528428
429	2	12.3319	1.65617
430	2	0.0282508	27.7519
431	2	0.209426	0.012585
432	2	0.647187	5.00033
433	2	0.479767	0.0088171
434	2	0.0458174	6.00721
435	2	0.0514079	0.0472956
436	2	0.017825	6.03913
437	2	1.00098	0.292096
438	2	0.0381092	5.00481
439	2	1.00815	0.089377
440	2	0.0979558	2.75334
441	2	0.204659	0.0151751
442	2	1.8602	0.0039951
443	2	10	8.61569
444	2	0.155249	0.008736
445	2	0.120512	0.004288
446	2	0.95726	6.31524
447	2	0.0067769	0.017152
448	2	18.9088	1.84615
449	2	0.0057681	23.717
450	2	0.126192	0.127142
451	2	10.2572	0.754983
452	2	0.34756	7.76394
453	2	1.0048	0.0011623
454	2	0.796214	0.003085
455	2	0.760379	32.9266
456	2	1.00381	10.6211
457	2	0.246054	0.0178975
458	2	0.372417	0.179806
459	2	0.195447	2.20562
460	2	0.417859	0.0053036
461	2	0.693474	0.0033187
462	2	0.263651	4.71035
463	2	0.550846	0.0120445
464	2	0.74307	5.53139
465	2	0.372417	5.08765
466	2	0.399052	7.0042
467	2	0.324362	0.283453
468	2	0.0693474	0.492382
469	2	1.48262	9.54683
470	2	1.00012	0.77849
471	2	0.144887	0.0684495
472	2	0.417859	10.5647
473	2	0.162566	3.10484
474	2	0.120512	0.53581
475	2	0.240453	0.226542
476	2	0.112468	0.512107
477	2	0.141589	0.0901112
478	2	0.0814761	0.907247
479	2	0.115088	10.7618
480	2	0.123319	0.190182
481	2	0.123319	0.182606
482	2	0.2	0.0182319
483	2	0.0408348	0.0054025
484	2	0.132139	0.968965
485	2	1.01742	0.02894
486	2	0.209426	36.5344
487	2	0.979558	5.95611
488	2	0.295822	2.47906
489	2	0.576806	0.355863
490	2	1.09355	11.9963
491	2	9.79558	3.01186
492	2	0.309763	0.107657
493	2	0.132139	0.0073536
494	2	1.12468	6.22104
495	2	0.618059	0.0118239
496	2	2.00065	0.0045116
497	2	0.0979558	0.133685
498	2	1.09796	0.276979
499	2	0.25765	0.0064907
500	2	0.2	8.80508
501	2	1.20512	0.0130421
502	2	0.170228	1.30241
503	2	0.339649	4.17465
504	2	3.00036	3.00601
505	2	0.0550846	10.111
506	2	0.95726	0.100326
507	2	0.833739	0.0016705
508	2	0.853159	8.0083
509	2	0.112468	5.14308
510	2	1.48262	0.175394
511	2	0.023498	0.18229
512	2	1.15088	7.00314
513	2	0.246054	0.856186
514	2	0.25765	0.374019
515	2	0.563677	0.011212
516	2	0.166353	0.0545398
517	2	2.08337	0.0085131
518	2	2.95822	5.65932
519	2	0.60399	0.0158826
520	2	0.833739	0.0289602
521	2	0.490942	2.13542
522	2	12.3319	0.0868919
523	2	1.02825	0.0036457
524	2	0.209426	0.0812127
525	2	0.647187	0.0136297
526	2	0.833739	0.251364
527	2	0.853159	0.0009309
528	2	0.112468	0.0464866
529	2	0.102572	0.0612836
530	2	2.63651	2.91706
531	2	0.190998	0.0016899
532	2	14.8262	5.67186
533	2	0.479767	0.359161
534	2	2.40453	7.77024
535	2	0.590242	0.166992
536	2	0.309763	0.507396
537	2	2.00129	0.0385676
538	2	0.0709627	0.197216
539	2	0.324362	5.35346
540	2	0.95726	0.0093805
541	2	1.12468	0.0180572
542	2	0.550846	8.96632
543	2	0.00191	0.0088468
544	2	0.0251785	0.0244792
545	2	1.7825	0.0998388
73	3	1.20512	2.26341
74	3	3.6394	0.284895
75	3	0.632455	0.440893
76	3	0.693474	1.29999
77	3	0.389969	0.811408
78	3	3.61806	0.687056
79	3	0.914176	0.520691
80	3	0.155249	1.51414
81	3	0.490942	0.598117
82	3	0.709627	5.99206
83	3	0.162566	0.234637
84	3	3.97956	3.24563
85	3	0.726156	1.40299
86	3	2	2.35953
87	3	0.295822	1.62282
88	3	0.276077	0.998961
89	3	4.42759	1.76357
90	3	0.490942	1.30903
91	3	0.490942	1.66844
92	3	3.6394	0.659068
546	3	1.09908	0.0019638
547	3	3.28251	1.22931
548	3	0.141589	0.0046853
549	3	0.331917	1.56011
550	3	1.17769	0.0070536
551	3	0.893367	0.91526
552	3	2.29631	0.047128
553	3	0.590242	2.02958
554	3	0.632455	0.359613
555	3	4.16635	0.249052
556	3	0.662262	0.0153514
557	3	0.550846	4.61986
558	3	0.479767	1.93729
559	3	5.02825	0.0367339
560	3	0.502377	0.0057769
561	3	2.29631	0.0032497
562	3	0.34756	0.0742148
563	3	0.490942	0.19466
564	3	0.182402	0.0108301
565	3	0.458174	0.007146
566	3	0.677688	0.0255804
567	3	0.796214	0.0064248
568	3	4.13214	0.078992
569	3	0.381092	1.42106
570	3	0.263651	3.55829
571	3	0.760379	0.658396
572	3	0.93547	0.0325747
573	3	0.316979	1.22647
574	3	0.246054	2.23641
575	3	3.0604	1.32671
576	3	0.331917	0.0337917
577	3	0.289088	2.99215
578	3	0.074307	1.6988
579	3	1.12468	0.278262
580	3	0.550846	2.51609
581	3	1.41589	1.28151
582	3	0.269793	0.0093009
583	3	0.381092	2.60766
584	3	0.709627	1.02658
585	3	3.31917	0.0210192
586	3	0.0618059	0.0254109
587	3	4.27592	0.0110108
588	3	3.89969	0.0056711
589	3	0.618059	0.0795517
590	3	3.10991	0.0079832
591	3	0.219296	0.320379
592	3	4.00514	0.357955
593	3	3.01552	0.0281872
594	3	0.246054	1.55832
595	3	0.316979	4.99742
596	3	0.468846	0.0186999
597	3	0.563677	1.87416
598	3	1.55249	3.36635
599	3	0.166353	0.0306846
600	3	0.662262	4.82719
601	3	0.550846	0.225018
602	3	0.479767	0.0383488
603	3	0.0282508	0.0169452
604	3	0.502377	0.0450556
605	3	2.29631	0.159656
606	3	0.34756	0.01083
607	3	0.490942	0.305205
608	3	3.1824	0.0037645
609	3	0.458174	0.251945
610	3	0.677688	0.0210678
611	3	0.796214	3.46099
612	3	2.13214	0.132381
613	3	0.381092	0.013059
614	3	0.263651	0.337706
615	3	0.760379	0.0309045
616	3	0.93547	0.0437451
617	3	0.316979	2.60229
618	3	2.10991	2.80471
619	3	0.219296	1.20967
620	3	3.00514	2.87026
621	3	3.01552	0.304501
PMR values of disease species were compared in pairs
Sample 1-Sample 2	significance	Adj.significance a
CHB-HC	0.001	0.003
HCC-HC	0	0
HCC-CHB	0	0
Each row tests the null hypothesis that sample 1 and sample 2 have the same distribution.
Progressive significance was shown (two-sided test).The significance level was 0.05.
a Significance values have been adjusted by Bonferroni correction for a number of tests.
The mRNA levels of disease species were compared in pairs
Sample 1-Sample 2	significance	Adj.significance a
HCC-CHB	0	0
HCC-HC	0	0
CHB-HC	0	0
Each row tests the null hypothesis that sample 1 and sample 2 have the same distribution.
Progressive significance was shown (two-sided test).The significance level was 0.05.
a Significance values have been adjusted by Bonferroni correction for a number of tests.
